# Supplementary material
Source: PubMed Central journal article supplement (PMC3577103)
Supplement: supp_kxr033_kxr033supp.pdf [file supp_kxr033_kxr033supp.pdf]

## Supplementary Materials

This file contains estimation results for the pancreatic and liver cancer studies using iLB.

Table 6. *Pancreatic cancer markers identified using iLB and their estimated regression coefficients.*

| UniGene   | Gene Name | D1     | D2     | D3     | D4     |
|-----------|-----------|--------|--------|--------|--------|
| Hs.107    | FGL1      | -0.025 | -0.025 | -0.032 | -0.023 |
| Hs.12068  | CRAT      | -0.193 | -0.264 | -0.135 | -0.202 |
| Hs.169900 | PABPC4    | -0.471 | -0.528 | -0.390 | -0.503 |
| Hs.180920 | RPS9      | -0.020 | -0.031 | -0.026 | -0.029 |
| Hs.226795 | GSTP1     | 0.024  | -0.029 | 0.039  | 0.005  |
| Hs.241257 | LTBP1     | 0.063  | 0.082  | 0.068  | 0.049  |
| Hs.287820 | FN1       | 0.429  | 0.439  | 0.438  | 0.368  |
| Hs.317432 | BCAT1     | -0.064 | -0.032 | -0.120 | -0.063 |
| Hs.410578 | P4HB      | -0.063 | -0.089 | -0.057 | -0.095 |
| Hs.433434 | PSMB7     | -0.003 | -0.015 | 0.006  | 0.008  |
| Hs.5591   | MKNK1     | -0.032 | -0.064 | -0.054 | -0.071 |
| Hs.62     | PTPN12    | 0.028  | 0.027  | 0.026  | 0.039  |
| Hs.66581  | PDIA2     | -0.151 | -0.165 | -0.193 | -0.084 |
| Hs.75335  | GATM      | -0.117 | -0.107 | -0.110 | -0.131 |
| Hs.76307  | NBL1      | 0.324  | 0.234  | 0.427  | 0.348  |
| Hs.83942  | CTSK      | 0.007  | 0.011  | 0.003  | 0.005  |
| Hs.84264  | ANP32B    | -0.020 | -0.107 | 0.099  | -0.061 |

[Received ]

Table 7. *Liver cancer markers identified using iLB and their estimated regression coefficients.*

| Gene Name                                                                         | D1     | D2     | D3     | D4     |
|-----------------------------------------------------------------------------------|--------|--------|--------|--------|
| prostaglandin-endoperoxide synthase 1 (prostaglandin G)                           | -0.051 | -0.096 | -0.040 | -0.050 |
| alcohol dehydrogenase 1C (class I), gamma polypeptide (ADH1C), mRNA               | -0.069 | -0.114 | -0.024 | -0.090 |
| mRNA for KIAA0472 protein, partial cds                                            | -0.050 | 0.058  | 0.009  | -0.050 |
| apolipoprotein A-I (APOA1), mRNA                                                  | -0.033 | -0.063 | -0.025 | -0.029 |
| EST387826 cDNA                                                                    | -0.060 | -0.031 | -0.007 | -0.036 |
| podocalyxin-like (PODXL), mRNA                                                    | -0.080 | -0.041 | -0.007 | -0.032 |
| ATPase, H <sup>+</sup> transporting, lysosomal (vacuolar proton pump) 9kD (ATP6H) | 0.055  | 0.092  | 0.038  | 0.001  |
| ubiquitination factor E4A (homologous to yeast UFD2) (UBE4A), mRNA                | -0.064 | -0.108 | -0.031 | -0.005 |
| UDP-glucose pyrophosphorylase 2 (UGP2), mRNA                                      | -0.033 | -0.030 | -0.004 | -0.044 |
| nomatch                                                                           | 0.011  | -0.044 | -0.021 | 0.003  |
| glutaredoxin (thioltransferase) (GLRX), mRNA                                      | -0.003 | -0.028 | -0.014 | -0.008 |
| nuclear gene encoding mitochondrial protein, mRNA                                 | 0.214  | 0.042  | 0.002  | 0.072  |
| thyroid hormone receptor interactor 12 (TRIP12), mRNA                             | 0.016  | 0.086  | -0.021 | -0.043 |
| H.sapiens polyA site DNA                                                          | 0.011  | 0.049  | 0.001  | 0.019  |
| thioredoxin-like, 32kD (TXNL), mRNA                                               | 0.019  | 0.012  | 0.005  | 0.003  |
| PAC clone RP5-978E18 from 7p21                                                    | -0.035 | -0.087 | -0.145 | -0.069 |
| Human G protein-coupled receptor V28 mRNA, complete cds                           | -0.063 | -0.053 | -0.033 | -0.063 |
| stromal cell-derived factor 1 (SDF1), mRNA                                        | -0.209 | -0.097 | -0.103 | -0.195 |
| noseq                                                                             | -0.011 | -0.075 | -0.179 | -0.001 |
| noseq                                                                             | 0.007  | 0.057  | 0.038  | 0.052  |
| checkpoint suppressor 1 (CHES1), mRNA                                             | 0.027  | 0.013  | 0.002  | 0.012  |
| 6-phosphofructo-2-kinase                                                          | -0.206 | -0.054 | -0.040 | -0.035 |
| polymerase (DNA directed), delta 1, catalytic subunit (125kD) (POLD1)             | -0.057 | -0.074 | -0.047 | -0.087 |
| Homer, neuronal immediate early gene, 3 (HOMER-3), mRNA                           | -0.029 | -0.174 | -0.053 | -0.039 |
| ribosomal protein S14 (RPS14), mRNA                                               | 0.025  | 0.043  | -0.003 | -0.008 |
| epididymal secretory protein (19.5kD) (HE1), mRNA                                 | 0.022  | 0.026  | 0.003  | 0.006  |
| CD33 antigen (gp67) (CD33), mRNA                                                  | 0.206  | 0.021  | 0.022  | 0.096  |
| neurotrophic tyrosine kinase, receptor, type 1 (NTRK1), mRNA                      | 0.155  | 0.131  | 0.035  | 0.041  |
| neutrophil cytosolic factor 1 (NCF1), mRNA                                        | -0.044 | -0.041 | -0.036 | -0.038 |
| betaine-homocysteine methyltransferase (BHMT), mRNA                               | -0.080 | -0.001 | -0.030 | -0.070 |
| RNA helicase-related protein (RNAHP), mRNA /                                      | -0.298 | -0.485 | -0.396 | -0.702 |
| H.sapiens polyA site DNA                                                          | 0.002  | 0.035  | 0.004  | 0.048  |
| chromosome 8 open reading frame 4 (C8orf4), mRNA                                  | -0.011 | -0.005 | -0.022 | -0.007 |
